# Supplementary material
Source: publisher figshare collection journal article supplement (https://plos.figshare.com/articles/dataset/_/129869)
Supplement: Supplementary file 1 [file 1]

Archive with 4 entries (4 files):
- Checklist_S1.doc
- Protocol_S1.pdf
- Appendix_S1.pdf
- Appendix_S2.doc
